# Supplementary material for: Rootstocks Genotypes Impact on Tree Development and Industrial Properties of ‘Valencia’ Sweet Orange Juice
Source: MDPI journal article supplement (doi:10.3390/horticulturae7060141), 2021-06-08
Supplement: s1 [file s1]

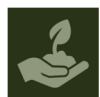

**Table S1.** Quick Reference Chart describing the influence of 20 rootstock genotypes on canopy volume, production, production efficiency, technological index, and

| Rootstocks                        | Canopy volume<br>(m <sup>3</sup> ) <sup>a</sup> | Production<br>(kg/tree) <sup>b</sup> | Production<br>Efficiency (kg m <sup>-3</sup> ) <sup>c</sup> | Technological index<br>(kg of SS per 40.8 kg box) <sup>d</sup> | Industrial yield (No. of 40.8 kg boxes ton <sup>-1</sup><br>of concentrated juice) <sup>e</sup> |
|-----------------------------------|-------------------------------------------------|--------------------------------------|-------------------------------------------------------------|----------------------------------------------------------------|-------------------------------------------------------------------------------------------------|
| ‘US-852’ citrandarin              | Intermediate                                    | Good                                 | Good                                                        | Good                                                           | Optimum                                                                                         |
| ‘US-801’ citrandarin              | High                                            | Optimum                              | Good                                                        | Good                                                           | Intermediate                                                                                    |
| ‘US-812’ citrandarin              | Intermediate                                    | Optimum                              | Optimum                                                     | Optimum                                                        | Optimum                                                                                         |
| IPEACS-239 citrandarin            | Low                                             | Good                                 | Optimum                                                     | Optimum                                                        | Optimum                                                                                         |
| IPEACS-256 citrandarin            | Low                                             | Good                                 | Optimum                                                     | Optimum                                                        | Optimum                                                                                         |
| IPEACS-264 citrandarin            | Very high                                       | Optimum                              | Intermediate                                                | Good                                                           | Good                                                                                            |
| F.80-3 citrumelo                  | Low                                             | Good                                 | Optimum                                                     | Good                                                           | Intermediate                                                                                    |
| F.80-5 citrumelo                  | Low                                             | Good                                 | Optimum                                                     | Good                                                           | Intermediate                                                                                    |
| F.80-6 citrumelo                  | Intermediate                                    | Good                                 | Good                                                        | Good                                                           | Good                                                                                            |
| F.80-7 citrumelo                  | High                                            | Optimum                              | Good                                                        | Intermediate                                                   | Poor                                                                                            |
| F.80-8 citrumelo                  | Very high                                       | Optimum                              | Good                                                        | Good                                                           | Good                                                                                            |
| ‘W-2’ citrumelo                   | High                                            | Optimum                              | Good                                                        | Good                                                           | Intermediate                                                                                    |
| ‘Swingle’ citrumelo               | Intermediate                                    | Optimum                              | Good                                                        | Good                                                           | Good                                                                                            |
| ‘US-802’ pummelo hybrid           | Low                                             | Optimum                              | Optimum                                                     | Good                                                           | Good                                                                                            |
| ‘Murcott’ tangor × ‘Trifoliata’-9 | Intermediate                                    | Optimum                              | Optimum                                                     | Good                                                           | Good                                                                                            |
| ‘Trifoliata’                      | Low                                             | Good                                 | Good                                                        | Good                                                           | Good                                                                                            |
| ‘Flying Dragon’                   | Low                                             | Poor                                 | Intermediate                                                | Good                                                           | Good                                                                                            |
| ‘Rangpur’ lime                    | Very high                                       | Optimum                              | Good                                                        | Intermediate                                                   | Poor                                                                                            |
| ‘Florida’ rough lemon             | Very high                                       | Optimum                              | Intermediate                                                | Intermediate                                                   | Poor                                                                                            |
| ‘Sunki’ tangerine                 | High                                            | Optimum                              | Good                                                        | Good                                                           | Good                                                                                            |

industrial yield of the ‘Valencia’ sweet orange.

<sup>a</sup>Canopy volume: Low: >4.0, <8.0; Intermediate: >8.0, <10.0; High: >10.0, <12.0; Very high: >12. <sup>b</sup> Production per tree: optimum: >70, <90; good: >40, <70; intermediate: >30, <40; poor: <40. <sup>c</sup> Production efficiency: optimum: >8.0, <10; good: >6.0, <8.0; intermediate: >5.0, <6.0; poor: <5.0. <sup>d</sup> Technological index: optimum: ≥2.7; good: >2.3, <2.7; intermediate: >2.0, <2.3; poor: <2.0. <sup>e</sup> Industrial yield: Optimum: <255; Good: >255, <275; Intermediate: >275, <300; Poor: >300. The mean values are based on production per tree, production efficiency, technological index, and industrial yield for the 2017, 2018, and 2019 harvest seasons, and of canopy volume for the 2019 harvest season, when the orchard was considered mature. SS: soluble solids (°Brix)
